# Supplementary material
Source: PubMed Central journal article supplement (PMC2763971)

## **Supplemental Material of Burkhalter, Roberts, Havener, and Ramsden**

**Supplemental Fig. 1.** Typical cell cycle profiles obtained by propidium iodide staining and flow cytometry after cell synchronization in (A) G1/G0 or (B) S phase. Shown are profiles of wild type (K1) cells.

**Supplemental Fig. 2.** Wild type (K1) cells were irradiated with 8 Gy or left untreated. At indicated time points after irradiation cells were fixed and probed for cleaved caspase-3, a marker for apoptotic cells (anti-cleaved Caspase-3 (Asp175) (5A1, Cell Signaling, 1:200) and Cy3-conjugated donkey anti-rabbit (Jackson ImmunoResearch; 1:1000)) as well as DAPI (5 µg/ml). No cells positive for cleaved Caspase 3 were detected after irradiation, indicating that apoptosis is not induced by irradiation during the analyzed time frame. As a positive control, cells were treated with 1µg/ml (f.c.) Staurosporine (Sigma) to induce apoptosis, which led to detection of cells positive for cleaved Caspase-3 after 2.5 h. Furthermore, staurosporine treatment induced fragmentation of nuclei at time points 5 h, 7.5 h, and 10 h, what was not observed in untreated or irradiated cells

**Supplemental Fig. 3.** Analysis of Rad51 focus formation by immunofluorescence during S phase. Quantification of Rad51 focus formation in R2-positive, S/G2 wild type (K1) and NHEJ-deficient (Xrs6) cells, averaged from three independent experiments.

**Supplemental Fig. 4.** Effect of p53R2 overexpression on nucleotide pools. Wild type (K1) or NHEJ-deficient (Xrs6) CHO cells were compared to subclones of these lines that stably overexpress p53R2 (K+P and X+P, respectively). Whole cell dATP levels (average

of two experiments +/- SD) were measured in G1/G0 or S phase enriched populations. We show the ratio of dATP in the p53R2 overexpressing subclone relative to the matching parental line. Cellular dNTP levels were measured essentially as previously described [1]. Synchronized cells were counted and washed twice with PBS. Cells were extracted by resuspension in 60% chilled ethanol containing 10 mM Tris pH7.5 at a density of  $5 \times 10^4$  cells per  $\mu\text{l}$  and incubated on ice for 2 hours followed by incubation for 3 minutes at  $95^\circ\text{C}$ . Extracts were then clarified by centrifugation at  $4^\circ\text{C}$  for 15 minutes at  $16000 \times g$ . The supernatant was transferred into a new tube, lyophilized, and resuspended in 25 mM Tris-HCl pH 7.5 at a concentration of  $2.5 \times 10^5$  cells/ $\mu\text{l}$ . Extracts were added to 25  $\mu\text{l}$  reactions with 20 mM Tris 7.5, 5 mM DTT, 10 mM  $\text{MgCl}_2$ , 10 ng/ $\mu\text{l}$  BSA, 24-96 nM annealed oligonucleotide template (5'-CCGCCTCCACCGCC and 5'-AAATAAATAAATAAATAAATGGCGGTGGAGGCGG), and 6.6 nM [ $\alpha$ - $^{32}\text{P}$ ]TTP (along with 1.6 – 5 nM corresponding cold dTTP). Reactions were started with 0.25U Klenow fragment (exo<sup>-</sup>) and stopped after 20 minutes at  $37^\circ\text{C}$  by addition of EDTA to 20 mM. Reaction mixtures were then transferred onto DE80 paper (Whatman), washed 5 times with 5%  $\text{Na}_2\text{HPO}_4$ , and intensities analyzed by phosphor imager and ImageQuant as software. Averages and standard deviation of two experiments are shown.

**Supplemental Fig. 5.** Repair of a targeted double strand break by homologous recombination. (A) Effect of p53R2 overexpression on recombination after 48 hours. The cell line K-DR was assessed for GFP expression after transfection with empty vector alone or with I-SceI expression. GFP expression was further analyzed after transient expression of wild type p53R2 or a catalytic mutant of p53R2 (p53R2-CM), respectively,

with or without simultaneous expression of I-SceI. Shown are the absolute levels of GFP positive cells 48 hours after transfection. \*p53R2 overexpression stimulated GFP expression significantly;  $p=0.0372$ . The mean and the standard error of the mean of three independent experiments were calculated with Prism 4.0c (Graphpad).

### **References of Supplemental Material**

- [1] P.A. Sherman, J.A. Fyfe. Enzymatic assay for deoxyribonucleoside triphosphates using synthetic oligonucleotides as template primers, *Anal Biochem* 180 (1989) 222-226.

Supplemental Figure 1:

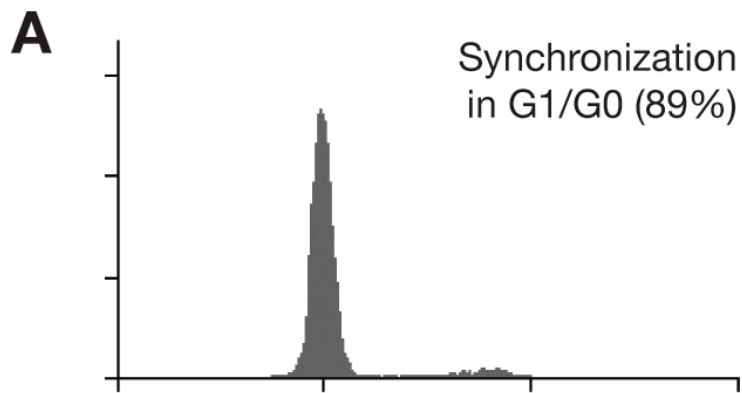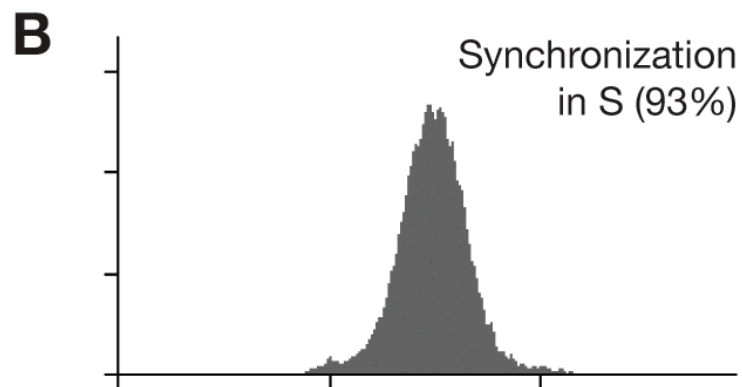

Supplemental Figure 2:

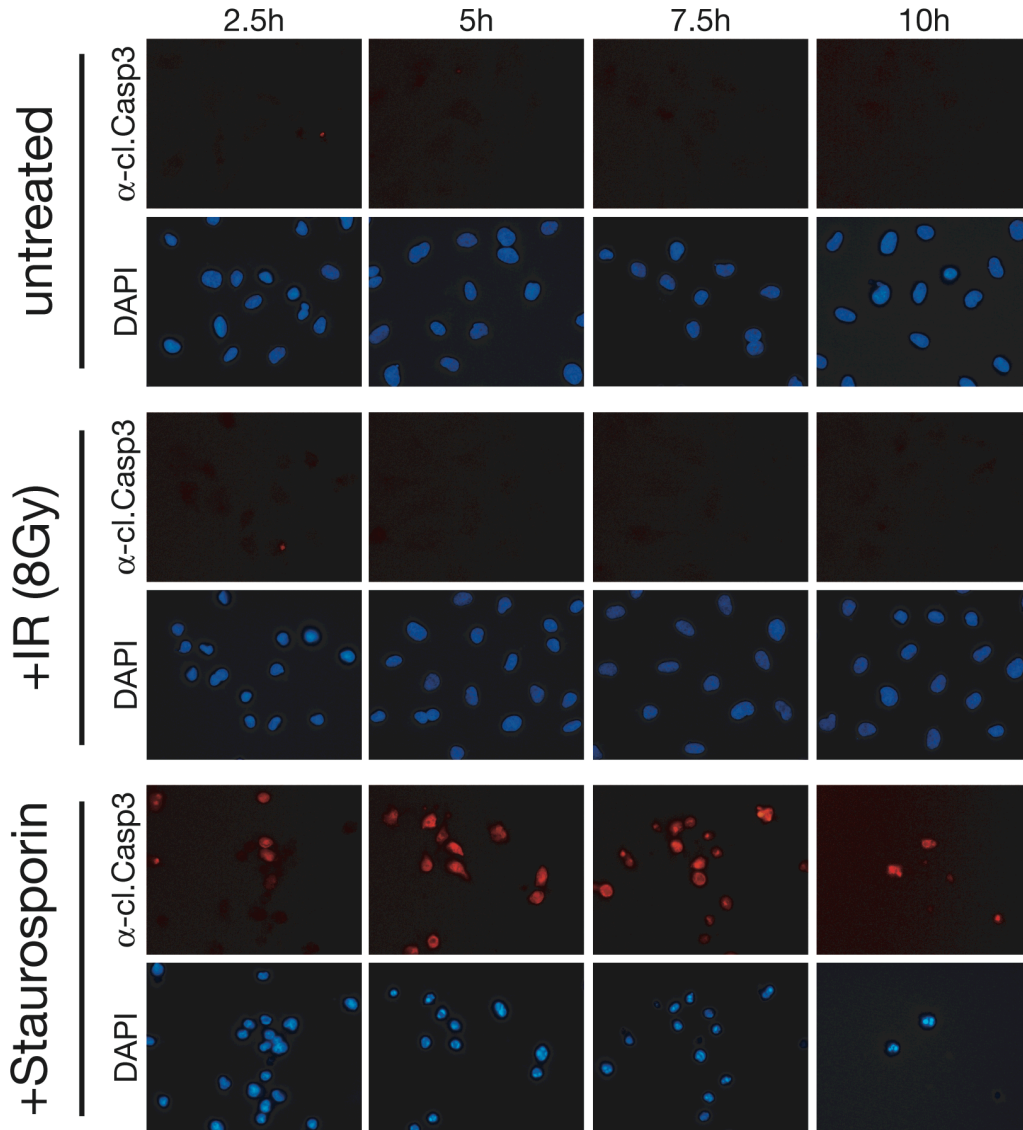

Supplemental Figure 3:

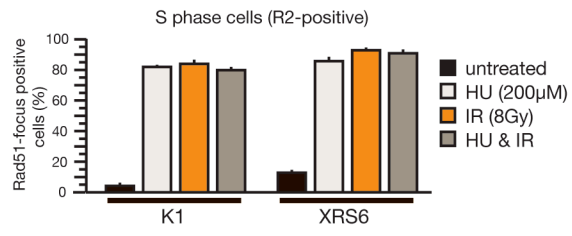

Supplemental Figure 4:

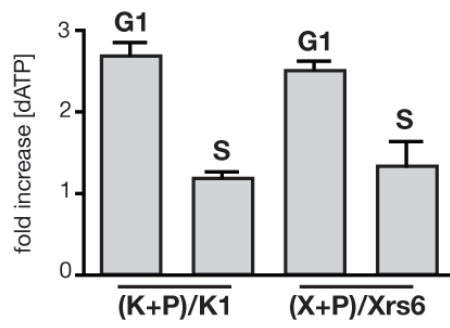

Supplemental Figure 5:

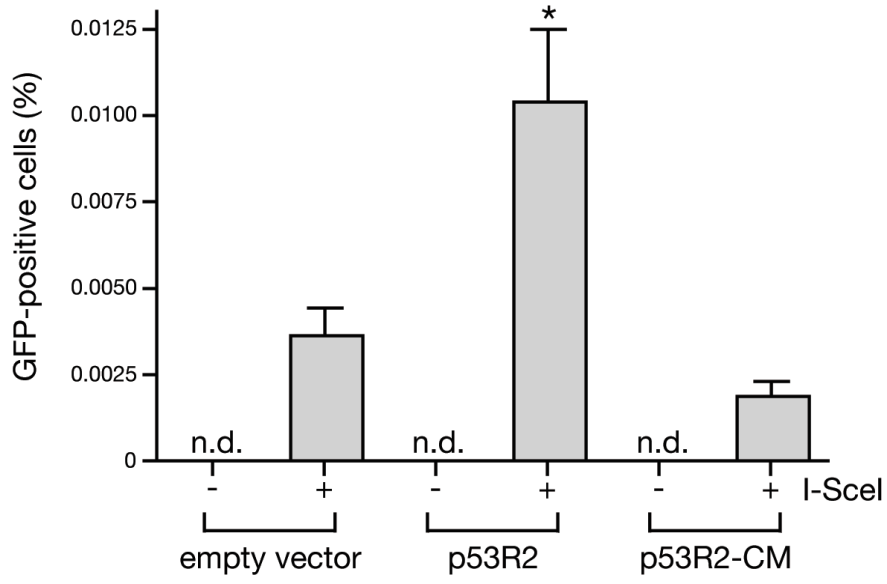

Supplement: NIHMS136370-supplement-01.pdf [file NIHMS136370-supplement-01.pdf]
